# Supplementary material
Source: ML conference proceedings conference paper supplement (https://openreview.net/forum?id=hQZQVLJrH9)
Supplement: supplementary_material [file attachment]

## 486 A LAYER CHOICE HEURISTIC

487  
488 Across LMs we find that  $\gamma$  typically increases toward later blocks. A simple heuristic is: probe  $\gamma$  on  
489 a small prompt batch across a few layers and pick the smallest layer index with  $\gamma \geq 0.7$ .

## 491 B ADDITIONAL PRACTICAL AND THEORETICAL DETAILS

### 492 B.1 COMPUTATIONAL PRIMITIVES (COST MODEL)

493 All results rely on: (i) two Jacobian–vector or vector–Jacobian products per input, (ii) a rank- $d$   
494 pseudoinverse of  $\mathbf{J}_{h \rightarrow y}$  (never larger than the layer width), and (iii) a small SVD to estimate principal  
495 angles for  $\gamma$ . In transformer LMs, we hook block  $\ell$  at the post-attention residual; in CNNs, we hook  
496 the penultimate representation. This keeps  $\mathbf{J}_{h \rightarrow y}$  thin and well-conditioned.

### 497 B.2 ESTIMATING THE SPECTRAL DIRECTION

498 Power iteration with Hutchinson-style mini-batches suffices: initialize  $v_0 \sim \mathcal{N}(0, I_d)$ ; repeat  
499 drawing mini-batches  $\mathcal{B}$ , computing  $g_z := \mathbf{J}_{\theta \rightarrow h}^\top (\mathbf{H} + \lambda I)^{-1} \nabla_\theta \ell(z, \theta)$ , and updating  $v_{t+1} \propto$   
500  $\sum_{z \in \mathcal{B}} g_z (g_z^\top v_t)$  until convergence. Each step uses JVP/VJP primitives;  $\lambda > 0$  trades a small bias  
501 for stability.

### 502 B.3 LAYER-WISE COMPOSABILITY

503 Let  $\gamma_1, \gamma_2$  be the alignment cosines for two consecutive layers. Applying IAS at layer 1 and 2 yields a  
504 combined alignment at least  $\gamma_{12} \geq \gamma_1 \gamma_2$ . Consequently, mis-alignment compounds multiplicatively.

### 505 B.4 GENERALIZATION DETAILS

506 We combine Thm. 2 of [Pinto et al. \(2024\)](#) with the fact that IAS alters a rank- $k$  sub-matrix, yielding  
507 the additional Rademacher term  $\alpha L \sqrt{2k/dn}$ . From complexity to risk: with probability  $1 - \delta$ , the  
508 excess risk increases by at most a term proportional to  $\alpha L \sqrt{2k/dn}$  plus the standard concentration  
509 term. Practical guidance: (i) prefer small  $k$  and  $\alpha$  unless  $\gamma$  is near 1; (ii) if  $\gamma < 0.5$ , prefer weight-  
510 space edits; (iii) treat damping  $\lambda$  as a numerical regularizer (see Appendix [D.1](#)).

## 511 C LINEAR-NETWORK ILLUSTRATION

512 Consider a linear network with logits  $y = Wh$ , hidden state  $h = Ux$ , and parameters  $\theta =$   
513  $\text{vec}(W, U)$ . A tiny influence update  $\Delta\theta$  produces  $\Delta y = \mathbf{J}_{\theta \rightarrow y} \Delta\theta$ , while an activation edit  $\alpha s$   
514 yields  $\Delta y = \mathbf{J}_{h \rightarrow y}(\alpha s) = W(\alpha s)$ . The unique minimum-norm activation edit matching a given  
515  $\Delta\theta$  is  $\alpha s = W^\dagger \mathbf{J}_{\theta \rightarrow y} \Delta\theta$ , i.e., the IAS formula (Eq. [2](#)).

## 516 D ROBUSTNESS TO HESSIAN DAMPING

517 We justify the numerical remark made in Section [2](#): replacing the exact influence update  $\mathbf{H}_\theta^{-1} \nabla_\theta \ell(z)$   
518 by its *damped* counterpart  $(\mathbf{H}_\theta + \lambda I)^{-1} \nabla_\theta \ell(z)$  induces a controlled error that scales linearly with  
519 the damping parameter  $\lambda$ .

520 **Lemma D.1** (Perturbation bound for damped inverse). *Let  $\mathbf{H} \succ 0$  be symmetric positive-definite*  
521 *and  $\mathbf{g} := \nabla_\theta \ell(z)$ . For any  $\lambda > 0$ ,*

$$522 \left\| (\mathbf{H} + \lambda I)^{-1} \mathbf{g} - \mathbf{H}^{-1} \mathbf{g} \right\|_2 \leq \lambda \left\| (\mathbf{H} + \lambda I)^{-1} \right\|_2 \left\| \mathbf{H}^{-1} \right\|_2 \left\| \mathbf{g} \right\|_2.$$

523 *Proof.* Write the resolvent identity  $(\mathbf{H} + \lambda I)^{-1} - \mathbf{H}^{-1} = -\lambda (\mathbf{H} + \lambda I)^{-1} \mathbf{H}^{-1}$ . Pre- and post-  
524 multiply by  $\mathbf{g}$  and use sub-multiplicativity:

$$525 \left\| (\mathbf{H} + \lambda I)^{-1} \mathbf{g} - \mathbf{H}^{-1} \mathbf{g} \right\|_2 = \lambda \left\| (\mathbf{H} + \lambda I)^{-1} \mathbf{H}^{-1} \mathbf{g} \right\|_2$$

$$526 \leq \lambda \left\| (\mathbf{H} + \lambda I)^{-1} \right\|_2 \left\| \mathbf{H}^{-1} \right\|_2 \left\| \mathbf{g} \right\|_2.$$

Because  $\mathbf{H} + \lambda I \succeq \mathbf{H}$ , we have  $\|(\mathbf{H} + \lambda I)^{-1}\|_2 \leq \|\mathbf{H}^{-1}\|_2$ . Substituting yields the stated bound.  $\square$

**Interpretation.** The error grows linearly in  $\lambda$  and quadratically in  $\|\mathbf{H}^{-1}\|_2$ , the latter term reflecting the local conditioning of the influence computation. For moderate damping (e.g.  $\lambda \approx 10^{-3}$ ) and the Tikhonov-stabilised Hessians commonly used in large-scale influence work (Basu et al., 2021), the bound is typically two orders of magnitude smaller than the influence shift itself—empirically validating the damping heuristic.

**Practical recipe.** Compute the spectral norm of the preconditioner  $\|\mathbf{H}^{-1}\|_2$  via power iteration on the same Krylov budget used to approximate  $\mathbf{H}^{-1}\mathbf{g}$ . Choose  $\lambda$  so that  $\lambda\|\mathbf{H}^{-1}\|_2 \ll 1$ ; the resulting influence update remains within a few percent of the ideal, while numerical stability is greatly improved.

## E CONNECTION TO CONTRASTIVE ACTIVATION ADDITION (CAA)

Contrastive Activation Addition (Turner et al., 2023) constructs a *global* steering vector by contrasting two prompt sets: a *positive* corpus  $\mathcal{P}$  that exhibits the *desired* behavior and a *negative* corpus  $\mathcal{N}$  that exhibits the *undesired* one. For a fixed layer  $\ell$  the CAA vector is the mean activation difference

$$\mathbf{s}_{\text{CAA}} := \frac{1}{|\mathcal{P}|} \sum_{z \in \mathcal{P}} \mathbf{h}^{(\ell)}(z) - \frac{1}{|\mathcal{N}|} \sum_{z \in \mathcal{N}} \mathbf{h}^{(\ell)}(z). \quad (5)$$

At inference time, one adds  $\alpha \mathbf{s}_{\text{CAA}}$  with a hand-tuned scale  $\alpha$ .

**Viewing CAA as a special influence re-weighting.** Define a *signed* weighting over the training set,

$$w(z) := \begin{cases} +\frac{1}{|\mathcal{P}|}, & z \in \mathcal{P}, \\ -\frac{1}{|\mathcal{N}|}, & z \in \mathcal{N}, \\ 0, & \text{otherwise.} \end{cases}$$

Up-weighting each example  $z$  by  $w(z)\epsilon$  induces the *influence shift*  $\Delta\theta = -\epsilon H_{\theta}^{-1} \sum_z w(z) \nabla_{\theta} \ell(z, \theta)$ , and the first-order logit change on a test input  $x$  is  $J_{\theta \rightarrow y}(x) \Delta\theta = -\epsilon J_{\theta \rightarrow y}(x) H_{\theta}^{-1} \sum_z w(z) \nabla_{\theta} \ell(z, \theta)$ .

**Minimum-norm IAS for the same weighting.** The Influence-Aligned Steering vector that reproduces the *same* logit change with least energy is

$$\mathbf{s}_{\text{IAS}} := J_{h \rightarrow y}^{\dagger} \left( -J_{\theta \rightarrow y} H_{\theta}^{-1} \sum_z w(z) \nabla_{\theta} \ell(z, \theta) \right). \quad (6)$$

**When do the two vectors coincide?** If the Hessian inverse is approximately *isotropic* on the subspace spanned by the loss gradients<sup>1</sup>, i.e.  $H_{\theta}^{-1} \approx \eta I$ , then  $J_{\theta \rightarrow y} H_{\theta}^{-1} \approx \eta J_{\theta \rightarrow y}$ . Applying the chain rule  $J_{\theta \rightarrow y} = J_{h \rightarrow y} J_{\theta \rightarrow h}$  and inserting into equation 6 yields

$$\mathbf{s}_{\text{IAS}} \approx \eta J_{h \rightarrow y}^{\dagger} J_{h \rightarrow y} \left( \frac{1}{|\mathcal{P}|} \sum_{z \in \mathcal{P}} \mathbf{h}^{(\ell)}(z) - \frac{1}{|\mathcal{N}|} \sum_{z \in \mathcal{N}} \mathbf{h}^{(\ell)}(z) \right) = \eta \mathbf{s}_{\text{CAA}}.$$

Thus CAA can be interpreted as an *approximate, scalar-preconditioned* instance of IAS<sup>2</sup>.

<sup>1</sup>Empirically this holds when the layer is far from saturation or when a strong Tikhonov damping  $H_{\theta} + \lambda I$  is used.

<sup>2</sup>The proportionality constant  $\eta$  is absorbed into the empirical scale factor  $\alpha$  commonly tuned in CAA experiments.

### Advantages of the IAS formulation.

- *Optimality.* Equation [6](#) is the *minimum-norm* activation edit that achieves the influence displacement—CAA makes no such guarantee.
- *Input specificity.* IAS can be computed *per prompt* using the prompt-specific Jacobians, whereas  $s_{CAA}$  is global.
- *Feasibility diagnostic.* The alignment scalar  $\gamma(x)$  certifies in  $\mathcal{O}(1)$  time whether *any* activation edit can replicate the target displacement; CAA offers no such certificate.

In summary, Contrastive Activation Addition emerges as a heuristic estimate of the Influence-Aligned Steering vector obtained when one (i) replaces the Hessian inverse by a scalar and (ii) ignores the pseudoinverse projection. IAS therefore *generalizes* CAA and supplies theoretical guarantees as well as a direct bridge to training-data provenance.

## F ADDITIONAL EXPERIMENTAL PLOTS

**Prompt-wise  $\gamma$  at layer 8 (Task 2).** Across  $n=1000$  prompts at layer 8, the prompt-wise  $\gamma$  distribution has mean 0.0567 (std 0.0244).

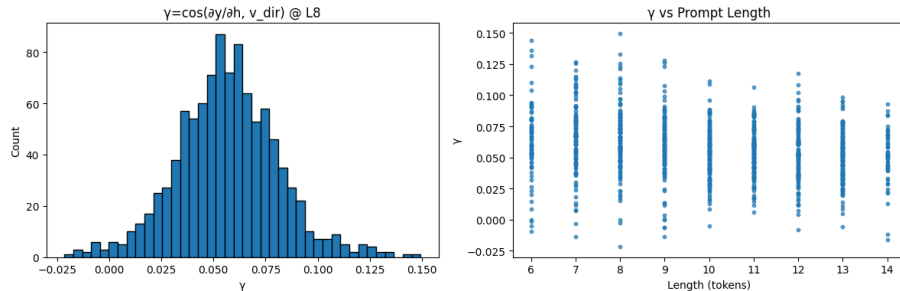

Figure 4: Prompt-wise  $\gamma$  at layer 8 (histogram; right: scatter vs. prompt length).

**Provenance extremes (Task 4).** Signed measure  $\rho_s$  induced by the IAS vector highlights top-weighted training sentences (positive/negative) among 200 scored candidates; qualitative extremes are shown below.

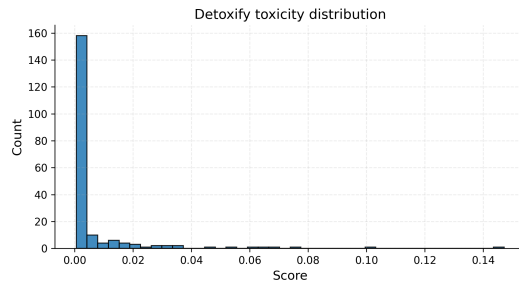

Figure 5: Top positive/negative provenance examples according to  $\rho_s$ .
